# Supplementary material for: Possible B–C bonding in the hydroboration of benzonitrile by an external electric field
Source: Royal Society of Chemistry journal article supplement (doi:10.1039/c8cp06704j), 2018-11-23
Supplement: c8cp06704j1.pdf [file c8cp06704j1.pdf]

# A Possible B–C Bonding Formation in Hydroboration of Benzonitrile by External Electric Field

Ming-Xia Zhang, and Hong-Liang Xu\*

Institute of Functional Material Chemistry, Department of Chemistry, National & Local United Engineering Lab for Power Battery, Northeast Normal University, Changchun 130024, Jilin, People's Republic of China.

## Contents

1. The complete citation of Reference (13). (**page 1**).
2. Reaction coordinates of transition states in gas phase and external electric field. (**page 2-6**)
3. Relative energies (in kJ/mol) of transition states, and products in two pathways with and without external electric field ( $F_Z$  in  $\times 10^{-4}$  a.u.) by method of CCSD(T)/6-311++G(2d,2p)//B3LYP/6-31G(d). (**Table S1, page 7**)
4. Relative energies (in kJ/mol) of transition states, and products in two pathways with and without external electric field ( $F_Z$  in  $\times 10^{-4}$  a.u.) by method of B3LYP-D3/6-311++G(d,p)//BP86-D3/6-31+G(d). (**Table S2, page 8**)
5. Relative energies (in kJ/mol) of transition states, and products in two pathways with and without external electric field ( $F_Z$  in  $\times 10^{-4}$  a.u.) by method of B3LYP/6-311++G(d,p)//BP86/6-31+G(d). (**Table S3, page 9**)
6. Relative energies (in kJ/mol) of products in two pathways with and without external electric field ( $F_Z$  in  $\times 10^{-4}$  a.u.). (**Table S4, page 10**)
7. Harmonic vibration frequencies (in  $\text{cm}^{-1}$ ) of transition states and products in two pathways with and without external electric field (in  $\times 10^{-4}$  a.u.). (**Table S5, page 11**)
8. Key bond lengths (in Å) of transition states ( $\text{TS}_{\text{AM}}$  and  $\text{TS}_{\text{M}}$ ) without and with external electric field ( $F_Z = 0, \pm 30, \pm 50, \pm 80, \text{ and } \pm 100$  ( $\times 10^{-4}$ ) a.u.) along  $F_Z$

- directions. (**Table S6, page 12**)
9. Key bond lengths (in Å) of transition states ( $TS_{AM}$  and  $TS_M$ ) without and with external electric field ( $F_x = 0$ , and  $\pm 50 (\times 10^{-4})$  a.u.) along  $F_x$  directions. (**Table S7, page 13**)
  10. Relative energies (in kJ/mol) of transition states and products in two pathways as external electric field (in  $\times 10^{-4}$  a.u.) are perpendicular ( $F_x$ ) to nitrogen-carbon triple bond. (**Table S8, page 14**)
  11. Variations of barrier heights for path AM and path M along with electric field by method of CCSD(T)/6-311++G(2d,2p)//B3LYP/6-31G(d) (the orange line is for path M, and the light blue line is for path AM). (**Figure S1, page 15**)
  12. Variations of barrier heights for path AM and path M along with electric field by method of B3LYP-D3/6-311++G(d,p)//BP86-D3/6-31+G(d) (the orange line is for path M, and the light blue line is for path AM). (**Figure S2, page 16**)
  13. Variations of barrier heights for path AM and path M along with electric field by method of B3LYP/6-311++G(d,p)//BP86/6-31+G(d) (the orange line is for path M, and the light blue line is for path AM). (**Figure S3, page 17**)
  14. a) IRC profiles with the variations of key bonds in the hydroboration of path AM; b) IRC profiles with the variations of key bonds in the hydroboration of path M; c) Changes of Mayer bond orders as the reaction proceeding in path AM; d) Changes of Mayer bond orders as the reaction proceeding in path M; e) Electron localization function (ELF) isosurface for path AM (the five points are selected from transition state and twentieth and fortieth points before and after transition states along IRC); f) Electron localization function isosurface for path M, the points are selected as same as path AM. (**Figure S4, page 18**)
  15. Geometries of stationary points along potential energy surfaces with key bond lengths and angles as external electric field is equal to  $50 (\times 10^{-4})$  a.u., the black are those optimized as electric field along Z axis, and the blue is for X axis (The values in square brackets are given in  $-50 (\times 10^{-4})$  a.u.; the bond lengths are given in Å, and angles in deg). (**Figure S5, page 19**)
  16. Barrier heights of two pathways (a for  $TS_{AM}$ , b for  $TS_M$ ) as the external electric field ( $F_z$ ) is equal to  $-50$ ,  $0$ , and  $50 (\times 10^{-4})$  a.u. in gas phase (the black line), THF (the blue line), DMSO (the red line), and  $C_6H_6$  (the orange line) solvents. (**Figure**

**S6, page 20)**

17. Variations of barrier heights for path AM and path M with EEF in hydroboration of <sup>t</sup>BuCN (the orange line is for path M, and the light blue line is for path AM).  
**(Figure S7, page 21)**

## Reference (13)

(13) M. J. Frisch, G. W. Trucks, H. B. Schlegel, G. E. Scuseria, M. A. Robb, J. R. Cheeseman, G. Scalmani, V. Barone, B. Mennucci, G. A. Petersson, H. Nakatsuji, M. Caricato, X. Li, H. P. Hratchian, A. F. Izmaylov, J. Bloino, G. Zheng, J. L. Sonnenberg, M. Hada, M. Ehara, K. Toyota, R. Fukuda, J. Hasegawa, M. Ishida, T. Nakajima, Y. Honda, O. Kitao, H. Nakai, T. Vreven, J. A. Montgomery, Jr, J. E. Peralta, F. Ogliaro, M. Bearpark, J. J. Heyd, E. Brothers, K. N. Kudin, V. N. Staroverov, T. Keith, R. Kobayashi, J. Normand, K. Raghavachari, A. Rendell, J. C. Burant, S. S. Iyengar, J. Tomasi, M. Cossi, N. Rega, J. M. Millam, M. Klene, J. E. Knox, J. B. Cross, V. Bakken, C. Adamo, J. Jaramillo, R. Gomperts, R. E. Stratmann, O. Yazyev, A. J. Austin, R. Cammi, C. Pomelli, J. W. Ochterski, R. L. Martin, K. Morokuma, V. G. Zakrzewski, G. A. Voth, P. Salvador, J. J. Dannenberg, S. Dapprich, A. D. Daniels, O. Farkas, J. B. Foresman, J. V. Ortiz, J. Cioslowski, D. J. Fox, Gaussian, Inc., Wallingford CT, 2013.

## Reaction coordinates:

$$F = 0$$

### TS<sub>AM</sub>

C,0,0.0146008244,-0.0304946072,1.2065745958

N,0,-0.0138415021,-0.0578221944,0.0027788774

B,0,1.6354006119,-0.0342013647,0.3743781106

H,0,1.6287905828,-0.0057217842,1.6429933383

C,0,-0.6461225041,-0.007807471,2.4953724999

C,0,-2.0532307243,-0.0213147916,2.4968165218

C,0,0.0615376298,0.0258913915,3.7030054134

C,0,-2.7376470661,-0.0009912202,3.7074829456

H,0,-2.588867584,-0.0475932168,1.5532530726

C,0,-0.6349954087,0.0460159507,4.9093332418

H,0,1.1470811728,0.0360169056,3.6903535813

C,0,-2.0311700185,0.0326028056,4.9136399164

H,0,-3.8235749428,-0.0114022246,3.7107526856

H,0,-0.0862376419,0.0722304456,5.8459403767

H,0,-2.5702843112,0.0483981379,5.8565928626

H,0,2.1079840545,-1.0902320586,0.0740966407

H,0,2.0885589577,1.0157605064,0.0266444693

### TS<sub>M</sub>

B,0,1.599989338,-0.0594997869,1.0277253208

H,0,1.5058927091,-0.0481353116,-0.248038172

N,0,-0.0101827888,0.0318714444,0.101881728  
C,0,0.0183571533,0.0243380173,1.3384784393  
C,0,-0.9242292163,0.0690954003,2.441575995  
C,0,-2.3077194761,0.1485272068,2.200760556  
C,0,-0.4422936463,0.0324015329,3.7578550725  
C,0,-3.1937615056,0.1905921485,3.2720752321  
H,0,-2.6716264505,0.1762831309,1.1780548803  
C,0,-1.335656842,0.0745942541,4.8262608863  
H,0,0.628186878,-0.0290349205,3.9273162992  
C,0,-2.7087730165,0.1536085107,4.5838361507  
H,0,-4.2625067669,0.252046374,3.0881554773  
H,0,-0.9624341449,0.0461521327,5.8457890509  
H,0,-3.4044825532,0.186558835,5.4178818717  
H,0,2.1331686383,0.9895702974,1.2571544865  
H,0,2.0170845604,-1.161931866,1.2471524956

**$F_Z = +50 (\times 10^{-4})$  a.u.**

**TS<sub>AM</sub>**

C,0,0.0104852277,-0.0207230628,1.2023054566  
N,0,-0.0108522868,-0.0452824482,0.0010176136  
B,0,1.6478251504,-0.0228849541,0.3828787222  
H,0,1.6415976276,0.0033997084,1.6517582418  
C,0,-0.6525614869,-0.0015947325,2.4909398519  
C,0,-2.0590383118,-0.0128279508,2.4969262681

C,0,0.0576783723,0.0263122119,3.6966793722  
C,0,-2.740042582,0.0037732247,3.7104364078  
H,0,-2.5978017433,-0.0342530744,1.5551224405  
C,0,-0.6347149245,0.0426567964,4.9053937374  
H,0,1.1429937666,0.0349995,3.6764373963  
C,0,-2.0307076202,0.0313735742,4.9146972305  
H,0,-3.8260569408,-0.0047017068,3.7143993403  
H,0,-0.0805283834,0.0645031806,5.8398794749  
H,0,-2.5679167447,0.044406172,5.8596595246  
H,0,2.1076648986,-1.0806929286,0.0760632199  
H,0,2.0891989811,1.0291894901,0.0326357014

### **TS<sub>M</sub>**

B,0,1.5972857188,-0.064983282,1.0210691738  
H,0,1.5272509877,-0.0585134964,-0.2522534391  
N,0,-0.0094229805,0.0225344809,0.0928938555  
C,0,0.0132913326,0.0184138038,1.32676261  
C,0,-0.9307154364,0.0653153788,2.4306410923  
C,0,-2.3143411272,0.1447531432,2.1956753338  
C,0,-0.4437493252,0.0306082017,3.7445940189  
C,0,-3.1960585548,0.1888749383,3.2718830173  
H,0,-2.6835460624,0.1709740654,1.1750659856  
C,0,-1.3318292046,0.0747208887,4.8171733016  
H,0,0.6281498846,-0.0309509326,3.9053517706

C,0,-2.706117067,0.1538536754,4.5812513729  
H,0,-4.2651149533,0.2503143761,3.0900613808  
H,0,-0.952031055,0.0475773812,5.8353153197  
H,0,-3.3993400254,0.1883922416,5.4182158973  
H,0,2.1257334395,0.9855758377,1.2564760573  
H,0,2.0113934286,-1.1666337018,1.2518552516

**$F_z = -50 (\times 10^4) \text{ a.u.}$**

**TS<sub>AM</sub>**

C,0,0.0202327389,-0.0204151983,1.211369158  
N,0,-0.0164589707,-0.0424065557,0.0041471737  
B,0,1.6227873961,-0.0235208705,0.3635101893  
H,0,1.6150248547,-0.0016674797,1.6333537543  
C,0,-0.6385387542,-0.001604235,2.4996994679  
C,0,-2.0467732416,-0.0135737298,2.4958072552  
C,0,0.0653191228,0.0270977837,3.7108378106  
C,0,-2.7353440608,0.0034056688,3.7032493386  
H,0,-2.5786064469,-0.0362990584,1.5496868395  
C,0,-0.6362036812,0.0439833371,4.9144969521  
H,0,1.1511367828,0.035865443,3.7066588303  
C,0,-2.0328282954,0.0321868519,4.9126155404  
H,0,-3.8212495364,-0.0060231499,3.7047764286  
H,0,-0.0936622301,0.0661693502,5.8542697797  
H,0,-2.5747612259,0.0452492913,5.8535222808



H,0,2.1066455784,-1.0766284507,0.0630006359

H,0,2.0905029694,1.0258340019,0.026228565

### **TS<sub>M</sub>**

B,0,1.5988706442,-0.0661295506,1.0185973425

H,0,1.479384717,-0.0543440672,-0.259751565

N,0,-0.0162910833,0.0259851424,0.0966702368

C,0,0.0199248338,0.0191855549,1.336495548

C,0,-0.9187662723,0.0653158272,2.4401991392

C,0,-2.3029700068,0.1438372033,2.1958532099

C,0,-0.439909489,0.0313767225,3.7587286929

C,0,-3.1912851139,0.1876129821,3.2637420478

H,0,-2.6633547995,0.169437403,1.1713492291

C,0,-1.3366637065,0.0754310557,4.8245595306

H,0,0.629411627,-0.0292686439,3.9354180517

C,0,-2.7091831348,0.1534087386,4.5776125742

H,0,-4.2600515787,0.2483416059,3.0792218955

H,0,-0.9683412526,0.0493659301,5.8453459606

H,0,-3.4061163715,0.1877376834,5.4100301697

H,0,2.1370785736,0.9821562375,1.2380475442

H,0,2.0191014133,-1.1686228248,1.2299123922

**$F_X = +50 (\times 10^{-4})$  a.u.**

### **TS<sub>AM</sub>**

C,0,0.0432825507,-0.0196304023,1.2172912004  
N,0,-0.0031677162,-0.0429960589,0.0051671855  
B,0,1.6065839057,-0.0234340866,0.3407441107  
H,0,1.5541992748,0.0006239967,1.6316869218  
C,0,-0.6378154167,-0.0013859696,2.497823581  
C,0,-2.0450647423,-0.0121516027,2.4940709095  
C,0,0.0655822459,0.0256250718,3.7090341965  
C,0,-2.7326335309,0.0041977633,3.7039980876  
H,0,-2.5811341589,-0.0330838294,1.5507337213  
C,0,-0.6328711051,0.0417614122,4.9131380509  
H,0,1.1520704557,0.0337471562,3.6989015481  
C,0,-2.0296757061,0.0310574273,4.9125070931  
H,0,-3.8181196885,-0.0039425469,3.7055195393  
H,0,-0.0879255646,0.0628344028,5.8525190024  
H,0,-2.5728415913,0.0437845144,5.8528897735  
H,0,2.1169387302,-1.0756732865,0.0805058755  
H,0,2.0998150576,1.0263190383,0.0406992029

### **TS<sub>M</sub>**

B,0,1.5971131586,-0.0658782011,1.0242572336  
H,0,1.4846653301,-0.0555387188,-0.2529986468  
N,0,-0.0053559333,0.0260076338,0.093194377  
C,0,0.016479775,0.0191561104,1.332522377  
C,0,-0.9268141548,0.0658822765,2.432574015

C,0,-2.3117197692,0.1444704702,2.1940066717  
C,0,-0.4418521369,0.0315952377,3.7489925138  
C,0,-3.1951464646,0.1882370167,3.2678147967  
H,0,-2.6817780524,0.1696556272,1.1735856649  
C,0,-1.3321792868,0.0756355938,4.8184104843  
H,0,0.6294973617,-0.030125584,3.9153010792  
C,0,-2.7066012178,0.153911293,4.5783849237  
H,0,-4.2640626253,0.2481991543,3.0877572317  
H,0,-0.9587775622,0.0485277677,5.8381158702  
H,0,-3.4012802612,0.187658679,5.4127867485  
H,0,2.1430795917,0.9787747511,1.2526299541  
H,0,2.0255712474,-1.1653421074,1.2446967054

**$F_X = -50 (\times 10^4) \text{ a.u.}$**

**TS<sub>AM</sub>**

C,0,-0.0318245718,-0.0207374833,1.1894218942  
N,0,-0.0225264567,-0.042419636,-0.0041652553  
B,0,1.6941153487,-0.0220961469,0.4202244431  
H,0,1.7309760192,0.0007373685,1.6644840814  
C,0,-0.6663785499,-0.0018356626,2.4881901543  
C,0,-2.0737473221,-0.0134517163,2.5015417875  
C,0,0.0515994476,0.0266032764,3.6895321531  
C,0,-2.7494867183,0.0034953397,3.7164243699  
H,0,-2.6141417228,-0.0357726434,1.5603459734

C,0,-0.6376999441,0.043396537,4.9012305102  
H,0,1.1362584715,0.0352375235,3.6686009893  
C,0,-2.0334590697,0.0318980867,4.9170490912  
H,0,-3.8362484883,-0.0056237583,3.7265098615  
H,0,-0.0804359616,0.0654252032,5.8326017512  
H,0,-2.5640644485,0.0450341651,5.8652775296  
H,0,2.1049138375,-1.0803825658,0.054152815  
H,0,2.0893731293,1.0281451126,0.0158078507

### **TS<sub>M</sub>**

B,0,1.5999686678,-0.0653837938,1.0147607868  
H,0,1.5222247405,-0.0576506892,-0.2592535018  
N,0,-0.0211139147,0.0219527371,0.0979596551  
C,0,0.0176748867,0.0182991678,1.3320486099  
C,0,-0.92255934,0.0653701131,2.4392685695  
C,0,-2.3054666107,0.1446226398,2.1981149904  
C,0,-0.4419272119,0.0307997704,3.7552510888  
C,0,-3.1929919449,0.1882401412,3.2679722071  
H,0,-2.664780863,0.1715552841,1.1735356491  
C,0,-1.3370848795,0.0745020221,4.8235165235  
H,0,0.628158908,-0.0295758762,3.9267356477  
C,0,-2.7096176463,0.1530151675,4.5804947887  
H,0,-4.2622788772,0.2503614454,3.0814813914  
H,0,-0.962480702,0.0482075757,5.8424481724

H,0,-3.4053738831,0.1877236648,5.4151758276

H,0,2.1216745071,0.989213569,1.2384190884

H,0,2.0068131633,-1.1704259387,1.2341025054

**Table S1.** Relative energies (in kJ/mol) of transition states, and products in two pathways with and without external electric field ( $F_Z$  in  $\times 10^{-4}$  a.u.) by method of CCSD(T)/6-311++G(2d,2p)//B3LYP/6-31G(d).

| <b>structure</b><br><b><math>F_Z</math></b> | <b>TS<sub>AM</sub></b> | <b>P<sub>AM</sub></b> | <b>TS<sub>M</sub></b> | <b>P<sub>M</sub></b> |
|---------------------------------------------|------------------------|-----------------------|-----------------------|----------------------|
| <b>50</b>                                   | 23.52                  | -153.80               | 76.33                 | -44.66               |
| <b>30</b>                                   | 23.41                  | -149.61               | 80.09                 | -38.29               |
| <b>0</b>                                    | 23.23                  | -143.86               | 85.91                 | -28.62               |
| <b>-30</b>                                  | 23.02                  | -122.04               | 91.90                 | -18.84               |
| <b>-50</b>                                  | 22.86                  | -135.84               | 96.00                 | -12.26               |

**Table S2.** Relative energies (in kJ/mol) of transition states, and products in two pathways with and without external electric field ( $F_Z$  in  $\times 10^{-4}$  a.u.) by method of B3LYP-D3/6-311++G(d,p)//BP86-D3/6-31+G(d).

| <b>structure</b><br><b><math>F_Z</math></b> | <b>TS<sub>AM</sub></b> | <b>P<sub>AM</sub></b> | <b>TS<sub>M</sub></b> | <b>P<sub>M</sub></b> |
|---------------------------------------------|------------------------|-----------------------|-----------------------|----------------------|
| <b>50</b>                                   | 7.68                   | -180.94               | 58.93                 | -54.35               |
| <b>30</b>                                   | 6.58                   | -176.09               | 62.65                 | -47.89               |
| <b>0</b>                                    | 5.21                   | -169.44               | 68.46                 | -38.05               |
| <b>-30</b>                                  | 3.93                   | -163.69               | 74.40                 | -28.15               |
| <b>-50</b>                                  | 1.90                   | -160.37               | 78.43                 | -21.46               |

**Table S3.** Relative energies (in kJ/mol) of transition states, and products in two pathways with and without external electric field ( $F_Z$  in  $\times 10^{-4}$  a.u.) by method of B3LYP/6-311++G(d,p)//BP86/6-31+G(d).

| <b>structure</b><br><b><math>F_Z</math></b> | <b>TS<sub>AM</sub></b> | <b>P<sub>AM</sub></b> | <b>TS<sub>M</sub></b> | <b>P<sub>M</sub></b> |
|---------------------------------------------|------------------------|-----------------------|-----------------------|----------------------|
| <b>50</b>                                   | 16.61                  | -173.64               | 67.10                 | -45.32               |
| <b>0</b>                                    | 14.36                  | -162.14               | 76.59                 | -29.10               |
| <b>-50</b>                                  | 11.00                  | -153.09               | 86.57                 | -12.51               |



**Table S4.** Relative energies (in kJ/mol) of products in two pathways with and without external electric field (the direction is oriented to  $F_Z$  in  $\times 10^{-4}$  a.u.).

| <b>Structure</b>     | <b>P<sub>AM</sub></b> | <b>P<sub>M</sub></b> |
|----------------------|-----------------------|----------------------|
| <b>F<sub>Z</sub></b> |                       |                      |
| <b>100</b>           | -162.00               | -56.80               |
| <b>80</b>            | -157.03               | -50.54               |
| <b>50</b>            | -150.17               | -41.14               |
| <b>30</b>            | -146.00               | -34.86               |
| <b>0</b>             | -140.35               | -25.39               |
| <b>-30</b>           | -118.77               | -15.86               |
| <b>-50</b>           | -132.62               | -9.48                |
| <b>-80</b>           | -129.06               | 0.14                 |
| <b>-100</b>          | -127.16               | 6.60                 |

**Table S5.** Harmonic vibration frequencies (in  $\text{cm}^{-1}$ ) of transition states and products in two pathways with and without external electric field (in  $\times 10^{-4}$  a.u.).

| Structure<br>EEF |                | $\text{TS}_{\text{AM}}$ | $\text{P}_{\text{AM}}$ | $\text{TS}_{\text{M}}$ | $\text{P}_{\text{M}}$ |
|------------------|----------------|-------------------------|------------------------|------------------------|-----------------------|
| $\mathbf{F}_Z$   | <b>100</b>     | 1 (-317.4i)             | 0                      | 1 (-821.4i)            | 0                     |
|                  | <b>80</b>      | 1 (-320.7i)             | 0                      | 1 (-836.4i)            | 0                     |
|                  | <b>50</b>      | 1 (-327.4i)             | 0                      | 1 (-859.2i)            | 0                     |
|                  | <b>30</b>      | 1 (-331.3i)             | 0                      | 1 (-874.5i)            | 0                     |
|                  | <b>0</b>       | 1 (-337.9i)             | 0                      | 1 (-896.5i)            | 0                     |
|                  | <b>-30</b>     | 1 (-346.0i)             | 0                      | 1 (-918.9i)            | 0                     |
|                  | <b>-50</b>     | 1 (-351.9i)             | 0                      | 1 (-932.8i)            | 0                     |
|                  | <b>-80</b>     | 1 (-359.7i)             | 0                      | 1 (-952.7i)            | 0                     |
|                  | <b>-100</b>    | 1 (-366.3i)             | 0                      | 1 (-965.1i)            | 0                     |
|                  | $\mathbf{F}_X$ | <b>50</b>               | 1 (-441.7i)            | 0                      | 1 (-928.8i)           |
| <b>-50</b>       |                | 1 (-200.9i)             | 0                      | 1 (-858.9i)            | 0                     |

**Table S6.** Key bond lengths (in Å) of transition states (TS<sub>AM</sub> and TS<sub>M</sub>) without and with external electric field ( $F_Z = 0, \pm 30, \pm 50, \pm 80, \text{ and } \pm 100$  ( $\times 10^{-4}$ ) a.u.) along  $F_Z$  directions.

| Structure        | EEF  |       |       |       |       |       |       |       |       |       |
|------------------|------|-------|-------|-------|-------|-------|-------|-------|-------|-------|
|                  | Bond | 0     | 30    | -30   | 50    | -50   | 80    | -80   | 100   | -100  |
| TS <sub>AM</sub> | N-C  | 1.204 | 1.203 | 1.206 | 1.202 | 1.208 | 1.200 | 1.210 | 1.200 | 1.212 |
|                  | N-B  | 1.691 | 1.698 | 1.683 | 1.702 | 1.678 | 1.709 | 1.671 | 1.713 | 1.666 |
|                  | C-H  | 1.672 | 1.684 | 1.659 | 1.692 | 1.650 | 1.705 | 1.637 | 1.713 | 1.628 |
|                  | B-H  | 1.269 | 1.269 | 1.269 | 1.269 | 1.270 | 1.270 | 1.271 | 1.270 | 1.272 |
|                  | C-C  | 1.448 | 1.449 | 1.448 | 1.449 | 1.447 | 1.450 | 1.446 | 1.450 | 1.445 |
|                  | N-C  | 1.237 | 1.235 | 1.239 | 1.234 | 1.240 | 1.233 | 1.243 | 1.232 | 1.244 |
| TS <sub>M</sub>  | C-B  | 1.614 | 1.615 | 1.613 | 1.615 | 1.613 | 1.616 | 1.612 | 1.617 | 1.612 |
|                  | B-H  | 1.279 | 1.277 | 1.282 | 1.275 | 1.284 | 1.273 | 1.287 | 1.272 | 1.289 |
|                  | N-H  | 1.558 | 1.569 | 1.547 | 1.577 | 1.540 | 1.589 | 1.529 | 1.597 | 1.523 |
|                  | C-C  | 1.452 | 1.453 | 1.450 | 1.453 | 1.450 | 1.454 | 1.448 | 1.454 | 1.447 |
|                  |      |       |       |       |       |       |       |       |       |       |

**Table S7.** Key bond lengths (in Å) of transition states (TS<sub>AM</sub> and TS<sub>M</sub>) without and with external electric field ( $F_x = 0$ , and  $\pm 50 (\times 10^{-4})$  a.u.) along  $F_x$  directions.

| Structure        | EEF  | 0     | 50    | -50   |
|------------------|------|-------|-------|-------|
|                  | Bond |       |       |       |
| TS <sub>AM</sub> | N-C  | 1.204 | 1.213 | 1.194 |
|                  | N-B  | 1.691 | 1.644 | 1.768 |
|                  | C-H  | 1.672 | 1.567 | 1.826 |
|                  | B-H  | 1.269 | 1.292 | 1.245 |
|                  | C-C  | 1.448 | 1.451 | 1.446 |
| TS <sub>M</sub>  | N-C  | 1.237 | 1.240 | 1.235 |
|                  | C-B  | 1.614 | 1.613 | 1.616 |
|                  | B-H  | 1.279 | 1.282 | 1.276 |
|                  | N-H  | 1.558 | 1.532 | 1.586 |
|                  | C-C  | 1.452 | 1.450 | 1.453 |

**Table S8.** Relative energies (in kJ/mol) of transition states and products in two pathways as external electric field (in  $\times 10^{-4}$  a.u.) are perpendicular ( $F_X$ ) to nitrogen–carbon triple bond.

| <b>Structure</b>     | <b>TS<sub>AM</sub></b> | <b>P<sub>AM</sub></b> | <b>TS<sub>M</sub></b> | <b>P<sub>M</sub></b> | <b>u</b> |
|----------------------|------------------------|-----------------------|-----------------------|----------------------|----------|
| <b>F<sub>X</sub></b> |                        |                       |                       |                      |          |
| <b>50</b>            | 5.99                   | -141.26               | 67.93                 | -25.36               | 4.57     |
| <b>-50</b>           | 33.87                  | -138.14               | 94.39                 | -27.96               | 4.55     |

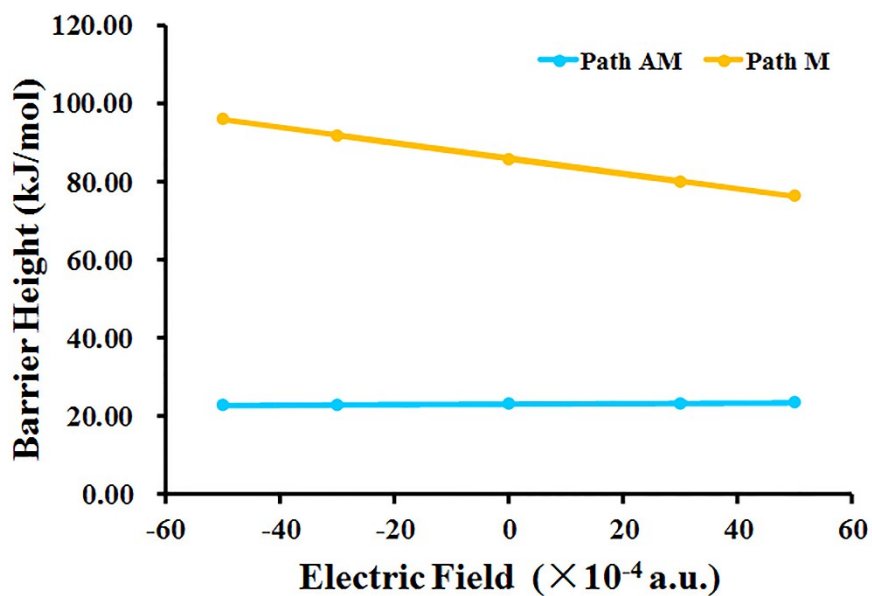

**Figure S1.** Variations of barrier heights for path AM and path M along with electric field by method of CCSD(T)/6-311++G(2d,2p)//B3LYP/6-31G(d) (the orange line is for path M, and the light blue line is for path AM).

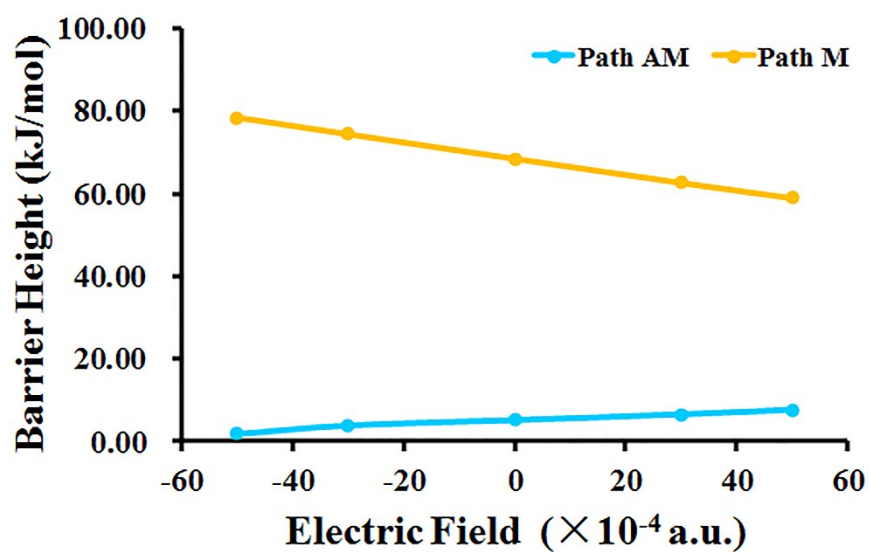

**Figure S2.** Variations of barrier heights for path AM and path M along with electric field by method of B3LYP-D3/6-311++G(d,p)//BP86-D3/6-31+G(d) (the orange line is for path M, and the light blue line is for path AM).

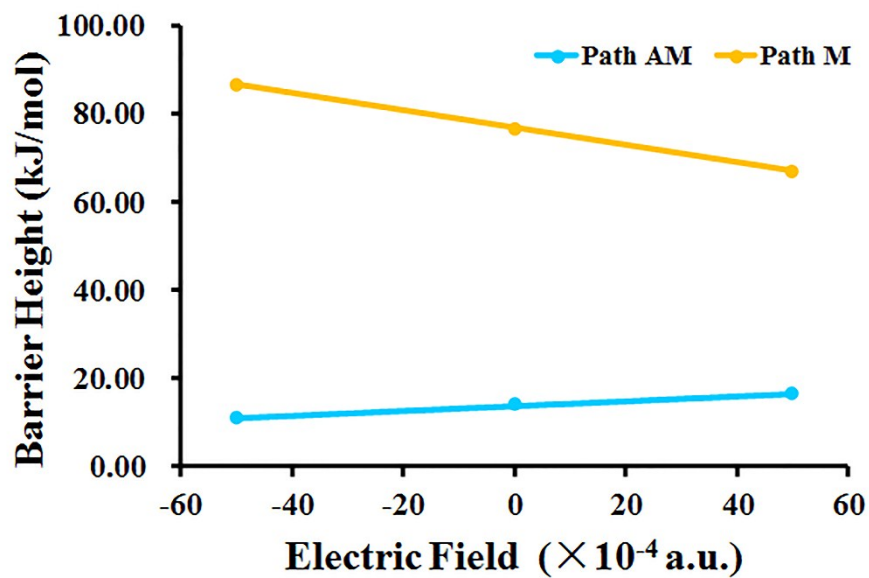

**Figure S3.** Variations of barrier heights for path AM and path M along with electric field by method of B3LYP/6-311++G(d,p)//BP86/6-31+G(d) (the orange line is for path M, and the light blue line is for path AM).



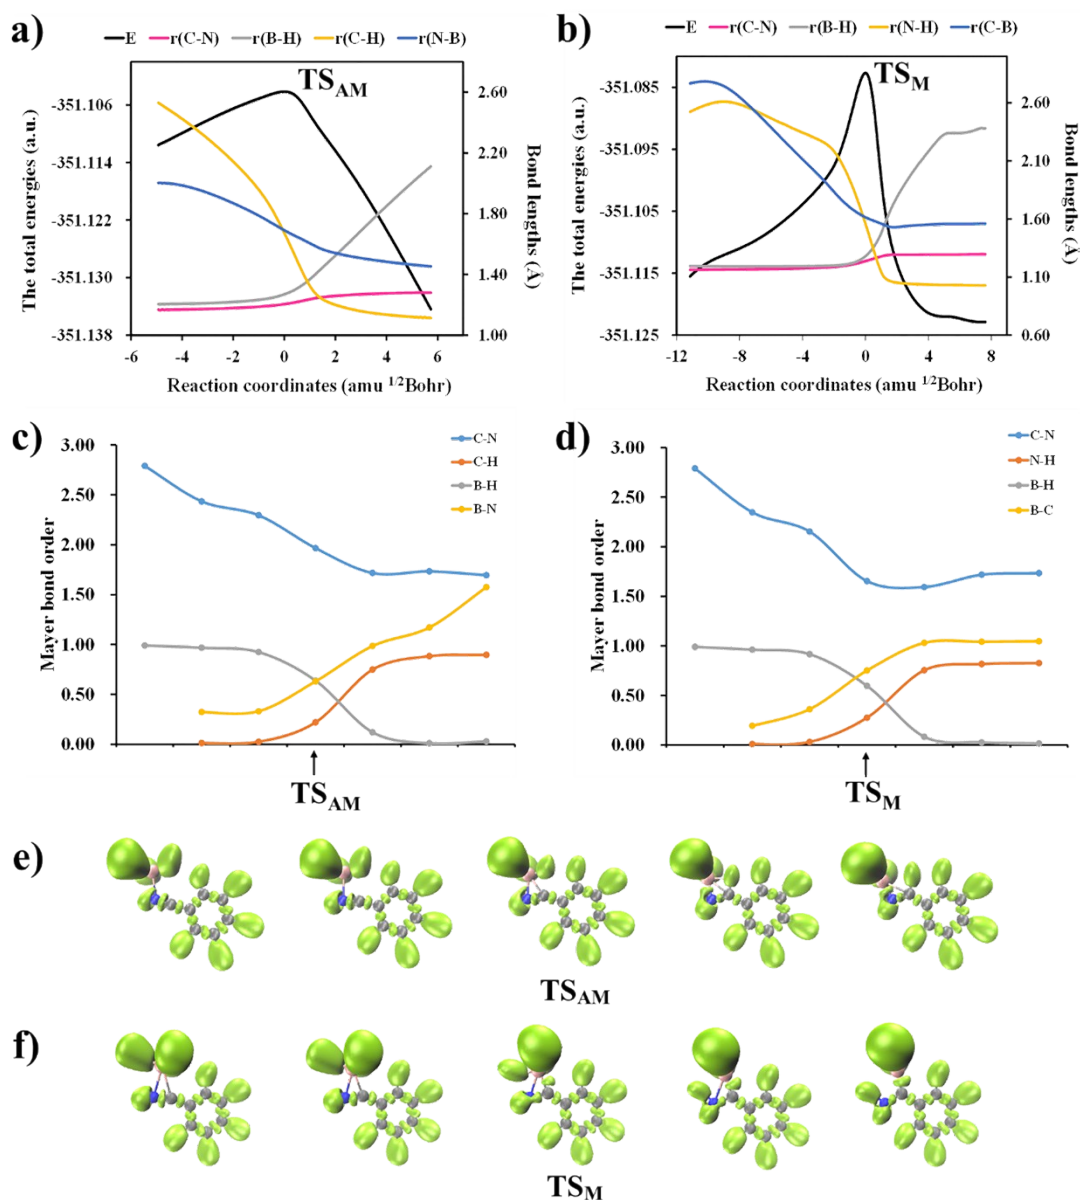

**Figure S4.** a) IRC profiles with the variations of key bonds in the hydroboration of path AM; b) IRC profiles with the variations of key bonds in the hydroboration of path M; c) Changes of Mayer bond orders as the reaction proceeding in path AM; d) Changes of Mayer bond orders as the reaction proceeding in path M; e) Electron localization function (ELF) isosurface for path AM (the five points are selected from transition state and twentieth and fortieth points before and after transition states along IRC); f) Electron localization function isosurface for path M, the points are selected as same as path AM.

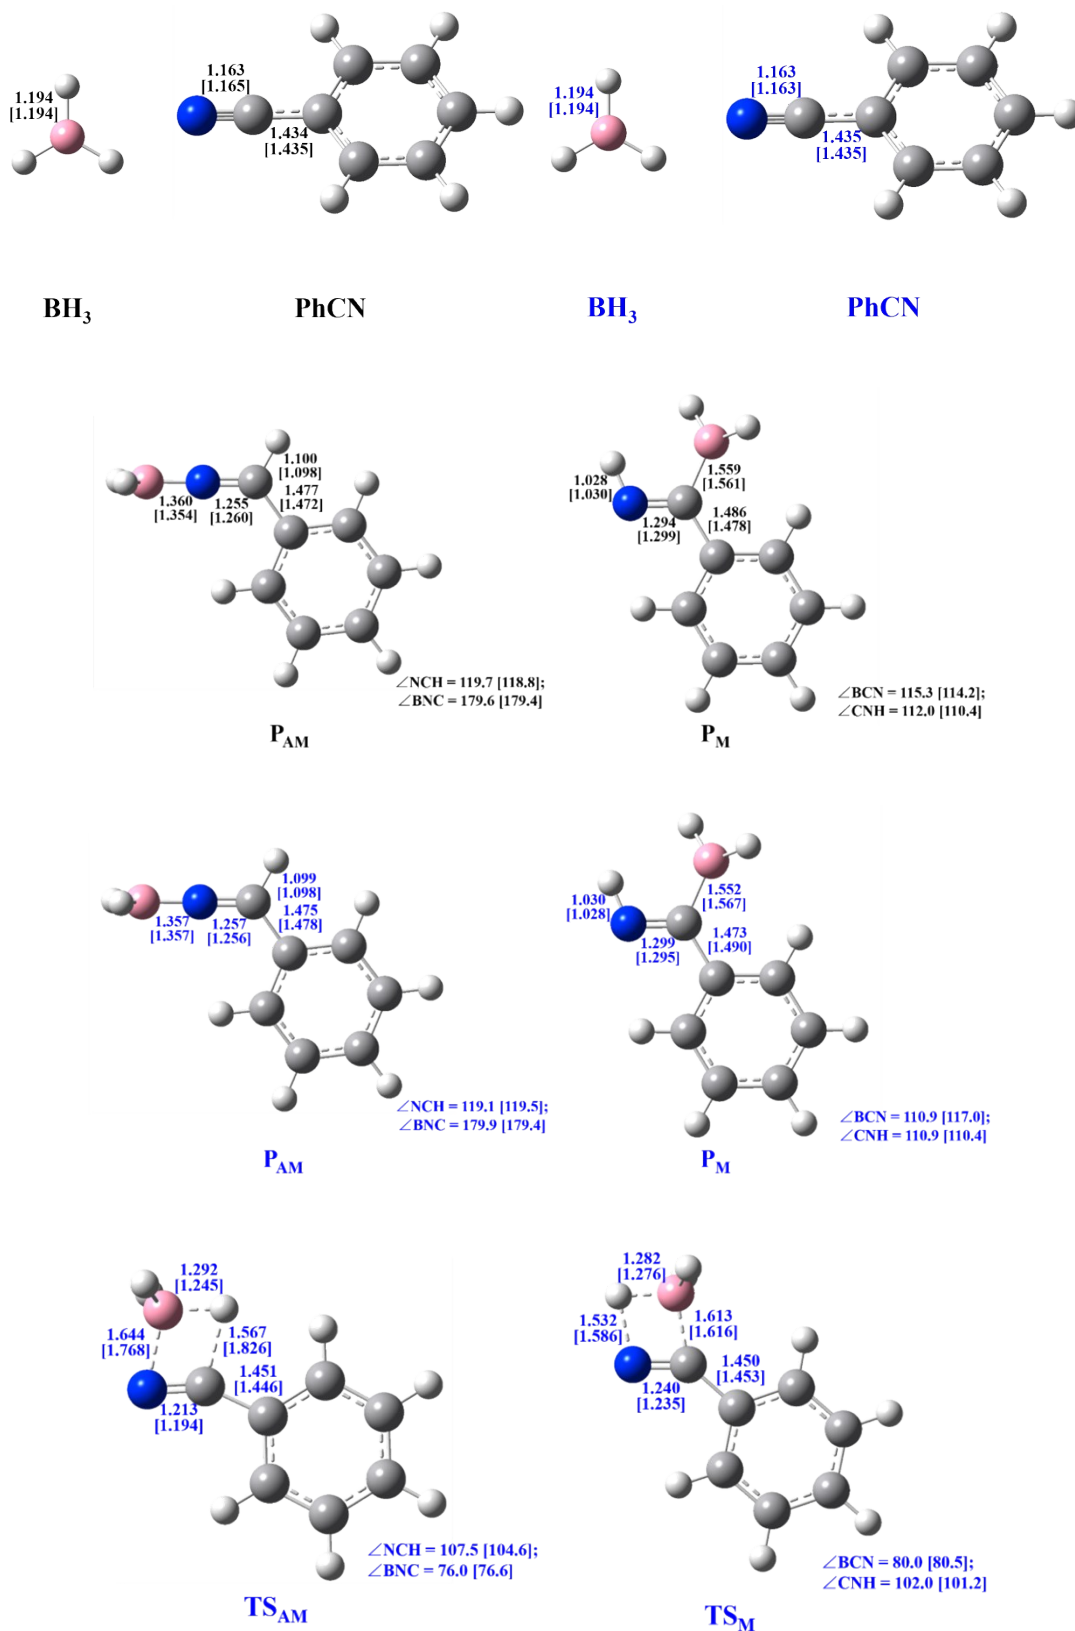

**Figure S5.** Geometries of stationary points along potential energy surfaces with key bond lengths and angles as external electric field is equal to  $50 (\times 10^{-4})$  a.u., the black

are those optimized as electric field along Z axis, and the blue is for X axis (The values in square brackets are given in  $-50 (\times 10^{-4})$  a.u.; the bond lengths are given in Å, and angles in deg).

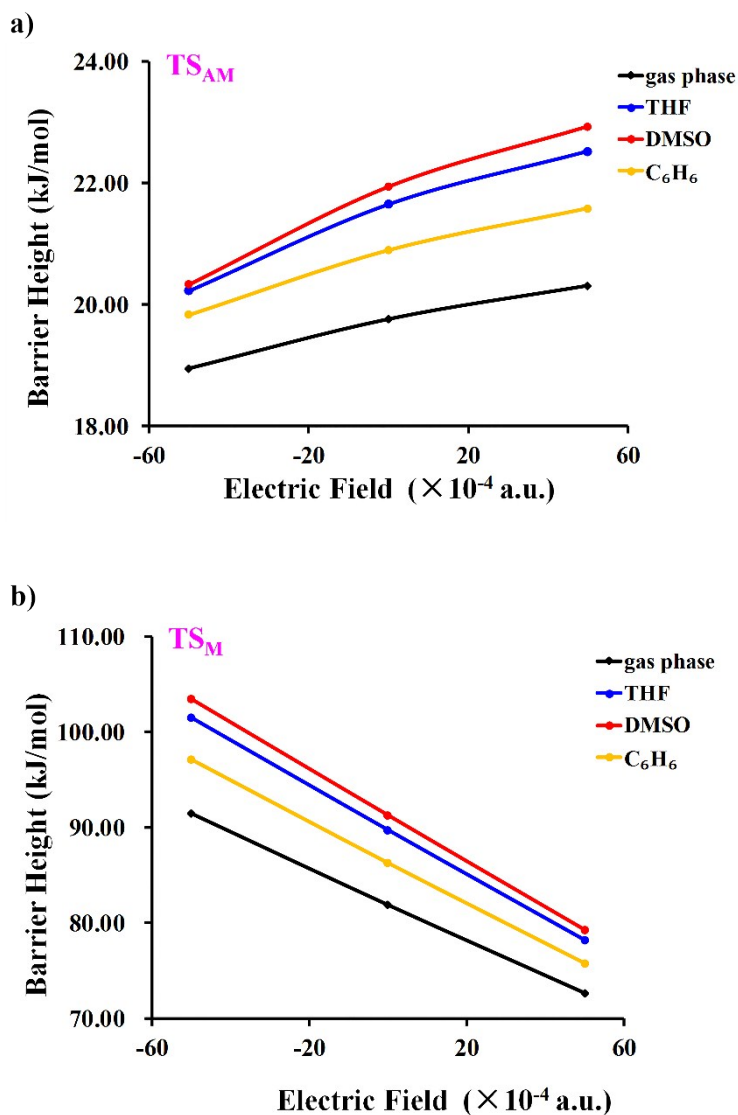

**Figure S6.** Barrier heights of two pathways (a for  $TS_{AM}$ , b for  $TS_M$ ) as the external electric field ( $F_Z$ ) is equal to  $-50$ ,  $0$ , and  $50 (\times 10^{-4})$  a.u. in gas phase (the black line), THF (the blue line), DMSO (the red line), and  $C_6H_6$  (the orange line) solvents.

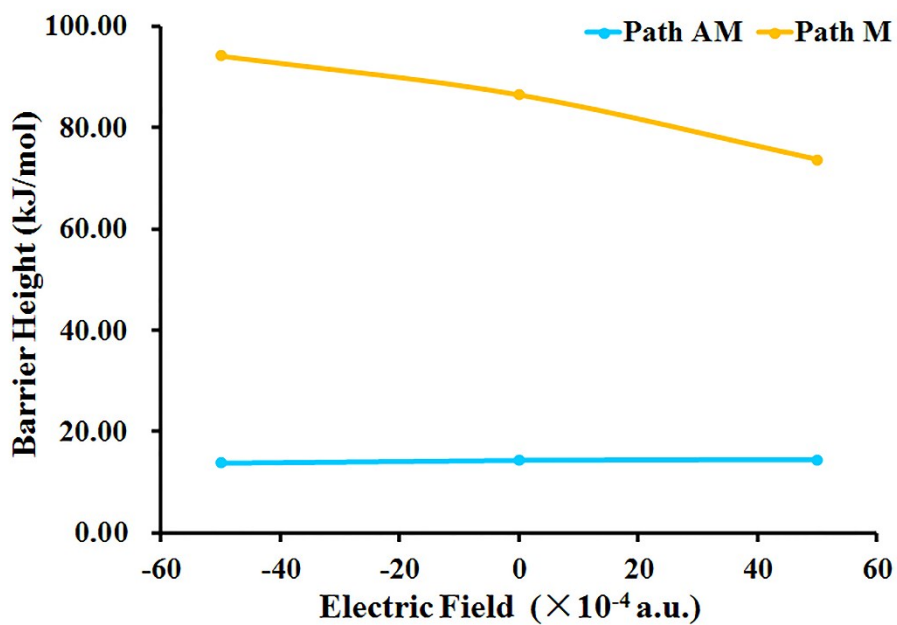

**Figure S7.** Variations of barrier heights for path AM and path M with EEF in hydroboration of  $t$ BuCN (the pink line is for path M, and the orange line is for path AM).
